# Supplementary material for: Fruitful Brewing: Exploring Consumers’ and Producers’ Attitudes towards Beer Produced with Local Fruit and Agroindustrial By-Products
Source: Preprints.org preprint supplement (doi:10.20944/preprints202407.1854.v1), 2024-07-24
Supplement: Supplementary file 1 [file supplementary]

## Sheet: consumers
	Involvement in sustainable eating				Local sourcing			Brewery cause activities				Taste only
Consumer	ISE_1	ISE_2	ISE_3	ISE_4	LS_1	LS_2	LS_3	BA_1	BA_2	BA_3	BA_4	TO_1	TO_2
Consumer_1	4	4	4	4	4	5	4	4	4	4	4	3	3
Consumer_2	6	6	6	6	5	5	5	5	4	5	5	3	3
Consumer_3	2	6	6	6	6	6	6	6	6	6	6	5	5
Consumer_4	6	6	6	6	6	6	6	6	4	4	6	6	7
Consumer_5	7	7	7	6	7	7	7	7	7	5	7	2	3
Consumer_6	6	6	6	6	6	6	6	6	6	6	6	3	2
Consumer_7	6	6	6	5	6	6	7	7	7	5	6	1	1
Consumer_8	5	4	4	4	4	4	5	5	4	4	4	4	4
Consumer_9	5	5	5	6	5	5	6	5	5	4	4	5	5
Consumer_10	6	6	6	6	6	6	6	6	7	6	6	2	2

## Sheet: producers
Producer	Sourcing of local ingredients	Recycling of waste or by-products material	Use of renewable energy	Recycling or reuse of process water	Use of recyclable packing	Use of reusable glass bottles or containers	Recovery of CO2
Producer_1	3	3	4	4	3	4	2
Producer_2	2	1	5	4	3	3	3
Producer_3	5	3	3	3	4	3	3
Producer_4	4	2	4	3	3	3	3
Producer_5	1	2	1	4	4	4	3
Producer_6	3	3	5	1	4	1	1
Producer_7	3	4	4	3	5	5	1
Producer_8	5	5	5	4	4	1	5
Producer_9	1	1	1	1	1	1	1
Producer_10	3	1	1	3	1	3	1
